# Supplementary material for: Revisiting the carbonyl n → π* electronic excitation through topological eyes: expanding, enriching and enhancing the chemical language using electron number distribution functions and domain averaged Fermi holes
Source: Royal Society of Chemistry journal article supplement (doi:10.1039/c5cp02847g), 2015-01-01
Supplement: c5cp02847g1.pdf [file c5cp02847g1.pdf]

## Supporting Information for:

# Revisiting the carbonyl $n \rightarrow \pi^*$ electronic excitation through topological eyes: expanding, enriching and enhancing the chemical language using electron number distribution functions and domain averaged Fermi holes

David Ferro-Costas, Evelio Francisco, Ángel Martín Pendás, and Ricardo A. Mosquera

### Partition into $\Omega = \Omega_C \cup \Omega_H$ and $\Omega' = \Omega_O \cup \Omega_{H'}$

In this section, we show the decomposition of the EDF vector associated to the partition of formaldehyde into  $\Omega_C \cup \Omega_H$  and its complement. Data correspond to the ground state (Table 1) and to the triplet  $T_1$  state (Table 2), both described at a monodeterminantal level.

**Table 1.** Decomposition of the  $\mathbf{p}_{16}$  EDF vector (with  $\Omega = \Omega_C \cup \Omega_H$ ) into (2c,2e) links for the  $S_0$  state (HF/cc-pVTZ). Each  $\mathbf{p}_2$  vector presents a null  $f$  parameter and, consequently, only its  $q$  value is shown, together with the corresponding  $\delta(\Omega, \Omega')$ .

| DNO            | $q_i$   | $\delta_i(\Omega, \Omega')$ |
|----------------|---------|-----------------------------|
| $1s_O$         | -1.0000 | 0.0000                      |
| $1s_C$         | 0.9981  | 0.0038                      |
| $2s_O$         | -0.9990 | 0.0020                      |
| $\sigma_{CH}$  | 0.9366  | 0.1227                      |
| $\sigma_{CH'}$ | 0.0036  | 1.0000                      |
| $\sigma_{CO}$  | -0.6782 | 0.5400                      |
| $\pi_{CO}$     | -0.5813 | 0.6621                      |
| $lp_O$         | -0.9467 | 0.1038                      |

**Table 2.** Decomposition of the  $\mathbf{p}_{16}$  EDF vector (with  $\Omega = \Omega_C \cup \Omega_H$ ) into (2c,2e) links for the  $T_1$  state (ROHF/cc-pVTZ). For each of these  $\mathbf{p}_2$  vector, the triad ( $q, f, \delta$ ) is shown.

| $\mathbf{p}_2^{ij} = \mathbf{p}_1(\phi_i) \otimes \mathbf{p}_1(\phi_j)$ | $(n_i^\Omega, n_j^\Omega)$ | $q_{ij}$ | $f_{ij}$ | $\delta_{ij}(\Omega, \Omega')$ |
|-------------------------------------------------------------------------|----------------------------|----------|----------|--------------------------------|
| $[1s_O]^\alpha \otimes [1s_O]^\beta$                                    | (0.0000, 0.0000)           | -1.0000  | 0.0000   | 0.0000                         |
| $[1s_C]^\alpha \otimes [1s_C]^\beta$                                    | (0.9990, 0.9990)           | 0.9980   | 0.0000   | 0.0040                         |
| $[2s_O]^\alpha \otimes [2s_O]^\beta$                                    | (0.0007, 0.0007)           | -0.9987  | 0.0000   | 0.0027                         |
| $[\sigma_{CH}]^\alpha \otimes [\sigma_{CH}]^\beta$                      | (0.9705, 0.9340)           | 0.9045   | 0.0073   | 0.1806                         |
| $[\sigma_{CO}]^\alpha \otimes [\sigma_{CO}]^\beta$                      | (0.1562, 0.1561)           | -0.6878  | 0.0000   | 0.5270                         |
| $[\sigma_{CH'}]^\alpha \otimes [\sigma_{CH'}]^\beta$                    | (0.5282, 0.5095)           | 0.0377   | 0.0003   | 0.9982                         |
| $[lp_O^\pi]^\alpha \otimes [lp_O]^\alpha$                               | (0.0147, 0.0214)           | -0.9639  | 0.0006   | 0.0709                         |
| $[lp_C^\pi]^\alpha \otimes [\pi_{CO}]^\beta$                            | (0.8551, 0.1221)           | -0.0229  | 0.5376   | 0.4622                         |

**Partition into  $\Omega = \Omega_C \cup \Omega_O$  and  $\Omega' = \Omega_H \cup \Omega_{H'}$**

In this section, we consider the partition into  $\Omega_C \cup \Omega_O$  and its complement (Tables 3 and 4).

**Table 3.** Decomposition of the  $\mathbf{p}_{16}$  EDF vector (with  $\Omega = \Omega_C \cup \Omega_O$ ) into (2c,2e) links for the  $S_0$  state (HF/cc-pVTZ). Each  $\mathbf{p}_2$  vector presents a null  $f$  parameter and, consequently, only its  $q$  value is shown, together with the corresponding  $\delta(\Omega, \Omega')$ .

| DNO                 | $q_i$   | $\delta_i(\Omega, \Omega')$ |
|---------------------|---------|-----------------------------|
| $1s_O$              | 1.0000  | 0.0000                      |
| $1s_C$              | 1.0000  | 0.0000                      |
| $2s_O$              | 0.9998  | 0.0004                      |
| $\sigma_{CH_2}(a1)$ | 0.2043  | 0.9583                      |
| $\sigma_{CH_2}(b2)$ | -0.1369 | 0.9813                      |
| $\sigma_{CO}$       | 0.9925  | 0.0150                      |
| $\pi_{CO}$          | 0.9718  | 0.0556                      |
| $lp_O$              | 0.9874  | 0.0249                      |

**Table 4.** Decomposition of the  $\mathbf{p}_{16}$  EDF vector (with  $\Omega = \Omega_C \cup \Omega_O$ ) into (2c,2e) links for the  $T_1$  state (ROHF/cc-pVTZ). For each of these  $\mathbf{p}_2$  vector, the triad  $(q, f, \delta)$  is shown.

| $\mathbf{p}_2^{ij} = \mathbf{p}_1(\phi_i) \otimes \mathbf{p}_1(\phi_j)$         | $(n_i^\Omega, n_j^\Omega)$ | $q_{ij}$ | $f_{ij}$ | $\delta_{ij}(\Omega, \Omega')$ |
|---------------------------------------------------------------------------------|----------------------------|----------|----------|--------------------------------|
| $[1s_O]^\alpha \otimes [1s_O]^\beta$                                            | ( 1.0000 , 1.0000 )        | 1.0000   | 0.0000   | 0.0000                         |
| $[1s_C]^\alpha \otimes [1s_C]^\beta$                                            | ( 1.0000 , 1.0000 )        | 1.0000   | 0.0000   | 0.0000                         |
| $[2s_O]^\alpha \otimes [2s_O]^\beta$                                            | ( 0.9999 , 0.9999 )        | 0.9999   | 0.0000   | 0.0003                         |
| $[\sigma_{CH_2}]^\alpha \otimes [\sigma_{CH_2}]^\beta(a_1)$                     | ( 0.6170 , 0.6170 )        | 0.2340   | 0.0000   | 0.9453                         |
| $[\sigma_{CO}]^\alpha \otimes [\sigma_{CO}]^\beta$                              | ( 0.9973 , 0.9973 )        | 0.9945   | 0.0000   | 0.0109                         |
| $[\sigma_{CH_2}]^\alpha \otimes [\sigma_{CH_2} + \kappa \cdot lp_O]^\beta(b_2)$ | ( 0.4727 , 0.5623 )        | 0.0350   | 0.0080   | 0.9907                         |
| $[lp_O^\pi]^\alpha \otimes [lp_O]^\alpha$                                       | ( 0.9996 , 0.9968 )        | 0.9964   | 0.0011   | 0.0071                         |
| $[lp_C^\pi]^\alpha \otimes [\pi_{CO}]^\beta$                                    | ( 0.9215 , 0.9960 )        | 0.9174   | 0.0351   | 0.1527                         |

**Partition into  $\Omega = \Omega_O$  and  $\Omega' = \Omega_C \cup \Omega_H \cup \Omega_{H'}$**

In this section, we consider the partition into  $\Omega_O$  and its complement (Tables 5 and 6).

**Table 5.** Decomposition of the  $\mathbf{p}_{16}$  EDF vector (with  $\Omega = \Omega_O$ ) into (2c,2e) links for the  $S_0$  state (HF/cc-pVTZ). Each  $\mathbf{p}_2$  vector presents a null  $f$  parameter and, consequently, only its  $q$  value is shown, together with the corresponding  $\delta(\Omega, \Omega')$ .

| DNO                 | $q_i$   | $\delta_i(\Omega, \Omega')$ |
|---------------------|---------|-----------------------------|
| $1s_O$              | 1.0000  | 0.0000                      |
| $1s_C$              | -0.9981 | 0.0037                      |
| $2s_O$              | 0.9988  | 0.0025                      |
| $\sigma_{CH_2}(a1)$ | -0.9662 | 0.0665                      |
| $\sigma_{CH_2}(b2)$ | -0.9183 | 0.1568                      |
| $\sigma_{CO}$       | 0.6678  | 0.5541                      |
| $\pi_{CO}$          | 0.5672  | 0.6783                      |
| $lp_O$              | 0.9251  | 0.1442                      |

**Table 6.** Decomposition of the  $\mathbf{p}_{16}$  EDF vector (with  $\Omega = \Omega_O$ ) into (2c,2e) links for the  $T_1$  state (ROHF/cc-pVTZ). For each of these  $\mathbf{p}_2$  vector, the triad ( $q, f, \delta$ ) is shown.

| $\mathbf{p}_2^{ij} = \mathbf{p}_1(\phi_i) \otimes \mathbf{p}_1(\phi_j)$          | $(n_i^\Omega, n_j^\Omega)$ | $q_{ij}$ | $f_{ij}$ | $\delta_{ij}(\Omega, \Omega')$ |
|----------------------------------------------------------------------------------|----------------------------|----------|----------|--------------------------------|
| $[1s_O]^\alpha \otimes [1s_O]^\beta$                                             | ( 1.0000 , 1.0000 )        | 1.0000   | 0.0000   | 0.0000                         |
| $[1s_C]^\alpha \otimes [1s_C]^\beta$                                             | ( 0.0010 , 0.0010 )        | -0.9981  | 0.0000   | 0.0039                         |
| $[2s_O]^\alpha \otimes [2s_O]^\beta$                                             | ( 0.9992 , 0.9992 )        | 0.9985   | 0.0000   | 0.0030                         |
| $[\sigma_{CH_2}]^\alpha \otimes [\sigma_{CH_2}]^\beta (a_1)$                     | ( 0.0134 , 0.0134 )        | -0.9732  | 0.0000   | 0.0528                         |
| $[\sigma_{CO}]^\alpha \otimes [\sigma_{CO}]^\beta$                               | ( 0.8385 , 0.8385 )        | 0.6770   | 0.0000   | 0.5416                         |
| $[\sigma_{CH_2}]^\alpha \otimes [\sigma_{CH_2} + \kappa \cdot lp_O]^\beta (b_2)$ | ( 0.0422 , 0.1369 )        | -0.8209  | 0.0275   | 0.3171                         |
| $[lp_O^\pi]^\alpha \otimes [lp_O]^\alpha$                                        | ( 0.9843 , 0.9717 )        | 0.9560   | 0.0019   | 0.0860                         |
| $[lp_C^\pi]^\alpha \otimes [\pi_{CO}]^\beta$                                     | ( 0.1065 , 0.8759 )        | -0.0176  | 0.5923   | 0.4076                         |

**Partition into  $\Omega = \Omega_{H'}$  and  $\Omega' = \Omega_O \cup \Omega_C \cup \Omega_H$**

In this section, we consider the partition into  $\Omega_{H'}$  and its complement (Tables 7 and 8). Orbitals described by ‘–’ are basically defined within  $\Omega'$ , but they are not identified with single bonds or lone pairs.

**Table 7.** Decomposition of the  $\mathbf{p}_{16}$  EDF vector (with  $\Omega = \Omega_{H'}$ ) into (2c,2e) links for the  $S_0$  state (HF/cc-pVTZ). Each  $\mathbf{p}_2$  vector presents a null  $f$  parameter and, consequently, only its  $q$  value is shown, together with the corresponding  $\delta(\Omega, \Omega')$ .

| DNO            | $q_i$   | $\delta_i(\Omega, \Omega')$ |
|----------------|---------|-----------------------------|
| $1s_O$         | -1.0000 | 0.0000                      |
| $1s_C$         | -1.0000 | 0.0000                      |
| $2s_O$         | -0.9999 | 0.0001                      |
| –              | -0.9872 | 0.0254                      |
| –              | -0.9996 | 0.0007                      |
| $\sigma_{CH'}$ | -0.0445 | 0.9980                      |
| –              | -0.9923 | 0.0154                      |
| $\pi_{CO}$     | -0.9859 | 0.0280                      |

**Table 8.** Decomposition of the  $\mathbf{p}_{16}$  EDF vector (with  $\Omega = \Omega_{H'}$ ) into (2c,2e) links for the  $T_1$  state (ROHF/cc-pVTZ). For each of these  $\mathbf{p}_2$  vector, the triad ( $q, f, \delta$ ) is shown.

| $\mathbf{p}_2^{ij} = \mathbf{p}_1(\phi_i) \otimes \mathbf{p}_1(\phi_j)$ | $(n_i^\Omega, n_j^\Omega)$ | $q_{ij}$ | $f_{ij}$ | $\delta_{ij}(\Omega, \Omega')$ |
|-------------------------------------------------------------------------|----------------------------|----------|----------|--------------------------------|
| $[1s_O]^\alpha \otimes [1s_O]^\beta$                                    | ( 0.0000 , 0.0000 )        | -1.0000  | 0.0000   | 0.0000                         |
| $[1s_C]^\alpha \otimes [1s_C]^\beta$                                    | ( 0.0000 , 0.0000 )        | -1.0000  | 0.0000   | 0.0000                         |
| $[2s_O]^\alpha \otimes [2s_O]^\beta$                                    | ( 0.0000 , 0.0000 )        | -1.0000  | 0.0000   | 0.0001                         |
| $[-]^\alpha \otimes [-]^\beta$                                          | ( 0.0054 , 0.0054 )        | -0.9892  | 0.0000   | 0.0215                         |
| $[-]^\alpha \otimes [-]^\beta$                                          | ( 0.0002 , 0.0008 )        | -0.9990  | 0.0002   | 0.0019                         |
| $[\sigma_{CH'}]^\alpha \otimes [\sigma_{CH'}]^\beta$                    | ( 0.4505 , 0.4055 )        | -0.1440  | 0.0021   | 0.9772                         |
| $[lp_O^\pi]^\alpha \otimes [-]^\alpha$                                  | ( 0.0002 , 0.0021 )        | -0.9977  | 0.0008   | 0.0046                         |
| $[lp_C^\pi]^\alpha \otimes [\pi_{CO}]^\beta$                            | ( 0.0393 , 0.0020 )        | -0.9587  | 0.0172   | 0.0795                         |
